# Supplementary material for: Implementation of an interactive mobile application to pilot a rapid assay to detect HIV drug resistance mutations in Kenya
Source: bioRxiv or medRxiv preprint supplement (doi:10.1101/2021.05.06.21256654), 2021-05-08
Supplement: Supplementary file [file media-1.pdf]

**Supplementary Tables. Survey responses from participants regarding Aquarium and the OLA-Simple kit.**

Participants were asked to fill out a short survey immediately following the procedure, which included evaluating four statements on a 5-point Likert scale (strongly agree to disagree) (Supplementary **Table 1**) and three open-ended qualitative questions (Supplementary **Table 2**). For ordinal categorical values, modes are displayed for each statement. For open-ended questions, we present a summary of the responses describing the different points raised by all the participants.

**Table 1. Responses to statements**

| <b>Questionnaire statement</b>                                                                           | <b>Mode</b> |
|----------------------------------------------------------------------------------------------------------|-------------|
| <b>Specimen preparation:</b> I was able to perform these steps in less time than my usual DNA extraction | 4           |
| <b>PCR and Ligation*:</b> Using dried reagent is easier than setting up a traditional PCR reaction       | 4           |
| <b>Detection:</b> I understood the meaning of the bands in the strip                                     | 5           |
| <b>Kit instructions:</b> Instructions were easy to follow                                                | 5           |

\* Participants 11 and 12 answered NA to the PCR question, likely due to not having performed PCR prior to this training

Rating scale: 1=strongly disagree, 2=disagree, 3=neutral, 4=agree, and 5=strongly agree.

**Table 2. Summary of responses to open-ended questions**

| <p><b>What did you like best about using this kit?</b></p>                                                                                                                                                                                                                                                                                                                                                                                                                                                                                                                                                                                                                                                                                                                                             | <p><b>Which instruction(s) were not easy to follow? Please explain why.</b></p>                                                                                                                                                                                                                                                                                                                                                                                                                                                                                                                                                                                                                                                                                                                                                                                                                                                                                                                                                 | <p><b>What advice do you have for us to make kit and instructions easier to use?</b></p>                                                                                                                                                                                                                                                                                                                                                                                                                                                                                                                                                                                                                                                                                                                                                                                                                                                               |
|--------------------------------------------------------------------------------------------------------------------------------------------------------------------------------------------------------------------------------------------------------------------------------------------------------------------------------------------------------------------------------------------------------------------------------------------------------------------------------------------------------------------------------------------------------------------------------------------------------------------------------------------------------------------------------------------------------------------------------------------------------------------------------------------------------|---------------------------------------------------------------------------------------------------------------------------------------------------------------------------------------------------------------------------------------------------------------------------------------------------------------------------------------------------------------------------------------------------------------------------------------------------------------------------------------------------------------------------------------------------------------------------------------------------------------------------------------------------------------------------------------------------------------------------------------------------------------------------------------------------------------------------------------------------------------------------------------------------------------------------------------------------------------------------------------------------------------------------------|--------------------------------------------------------------------------------------------------------------------------------------------------------------------------------------------------------------------------------------------------------------------------------------------------------------------------------------------------------------------------------------------------------------------------------------------------------------------------------------------------------------------------------------------------------------------------------------------------------------------------------------------------------------------------------------------------------------------------------------------------------------------------------------------------------------------------------------------------------------------------------------------------------------------------------------------------------|
| <ul style="list-style-type: none"> <li>• The instructions were easy to follow</li> <li>• The protocol was easy to understand.</li> <li>• The examples in Aquarium were well labeled and made it easy to know where to add each reagent or sample</li> <li>• The kit is user-friendly and straightforward</li> <li>• The kit is easy to use compared to the plate-based OLA method</li> <li>• There was only one PCR step instead of the usual two for nested PCR</li> <li>• Detection was simplified by Aquarium</li> <li>• Results are generated fast and are also portable</li> <li>• It is easy to read the bands and interpret the results: it clearly shows the control, the wild-type and the mutant</li> <li>• A single sample can be easily processed without the need for batching</li> </ul> | <ul style="list-style-type: none"> <li>• The instructions and procedure were clear and easy to follow.</li> <li>• The instructions were Ok when following a step, but it was difficult to memorize the steps without a written protocol to follow</li> <li>• Some instructions did not include the specific vial or reagent in the heading, but is was in the pictorial</li> <li>• Sample preparation:               <ul style="list-style-type: none"> <li>- the multiple tubes and SOP instructions were not alphabetically arranged</li> <li>- includes many tubes, color coding would help to identify which to use first and avoid mix-ups</li> <li>- too many steps make it confusing</li> <li>- the process is long with many reagents and waiting time</li> </ul> </li> <li>• During the ligation/detection step had challenges remembering to add reagent to the next strip</li> <li>• At times the tablet was not working, and we did not have a backup plan such as a written protocol with instructions.</li> </ul> | <ul style="list-style-type: none"> <li>• Enlarge the font under every heading.</li> <li>• Include the reagent vial ID on the headings for better clarity</li> <li>• The tube labels should match the SOP instruction labels.</li> <li>• Harmonize the sequence of adding reagents and closing of tubes to reduce multitasking and possible confusion.</li> <li>• Create system for how to keep track of addition of reagents to tubes</li> <li>• State what to expect at the end of each step, e.g. maybe a clean supernatant /deposit so one can confidently move to the next step</li> <li>• Look for alternatives to replace the current sample preparation method</li> <li>• Make the incubation time shorter</li> <li>• Improve turn-around time for clients.</li> <li>• Have print outs of the protocols as a back-up plan.</li> <li>• Make the kit commercially available with all the steps for laboratory technologists to follow.</li> </ul> |
